# Supplementary material for: Additional coils mitigate elevated defibrillation threshold in right-sided implantable cardioverter defibrillator generator placement: a simulation study
Source: PubMed Central journal article supplement (PMC10265967; doi:10.1093/europace/euad146), 2023-06-14
Supplement: euad146_supplementary_data.pdf [file euad146_supplementary_data.pdf]

# Additional coils mitigate elevated defibrillation threshold in right-sided ICD generator placement: a simulation study

Shuang Qian, PhD,\* Sofia Monaci, PhD,\* Caroline Mendonca-Costa, PhD,\* Fernando Campos, PhD,\* Philip Gemmell, PhD,\* Hassan A. Zaidi, MSc,\* Ronak Rajani, MD, FESC, FRCP, FSCCT,<sup>§</sup> John Whitaker, MD, PhD,<sup>§</sup> Christopher A. Rinaldi, MD, FRCP, FHRS,<sup>\*§</sup> Martin J. Bishop, PhD\*

## Supplement material

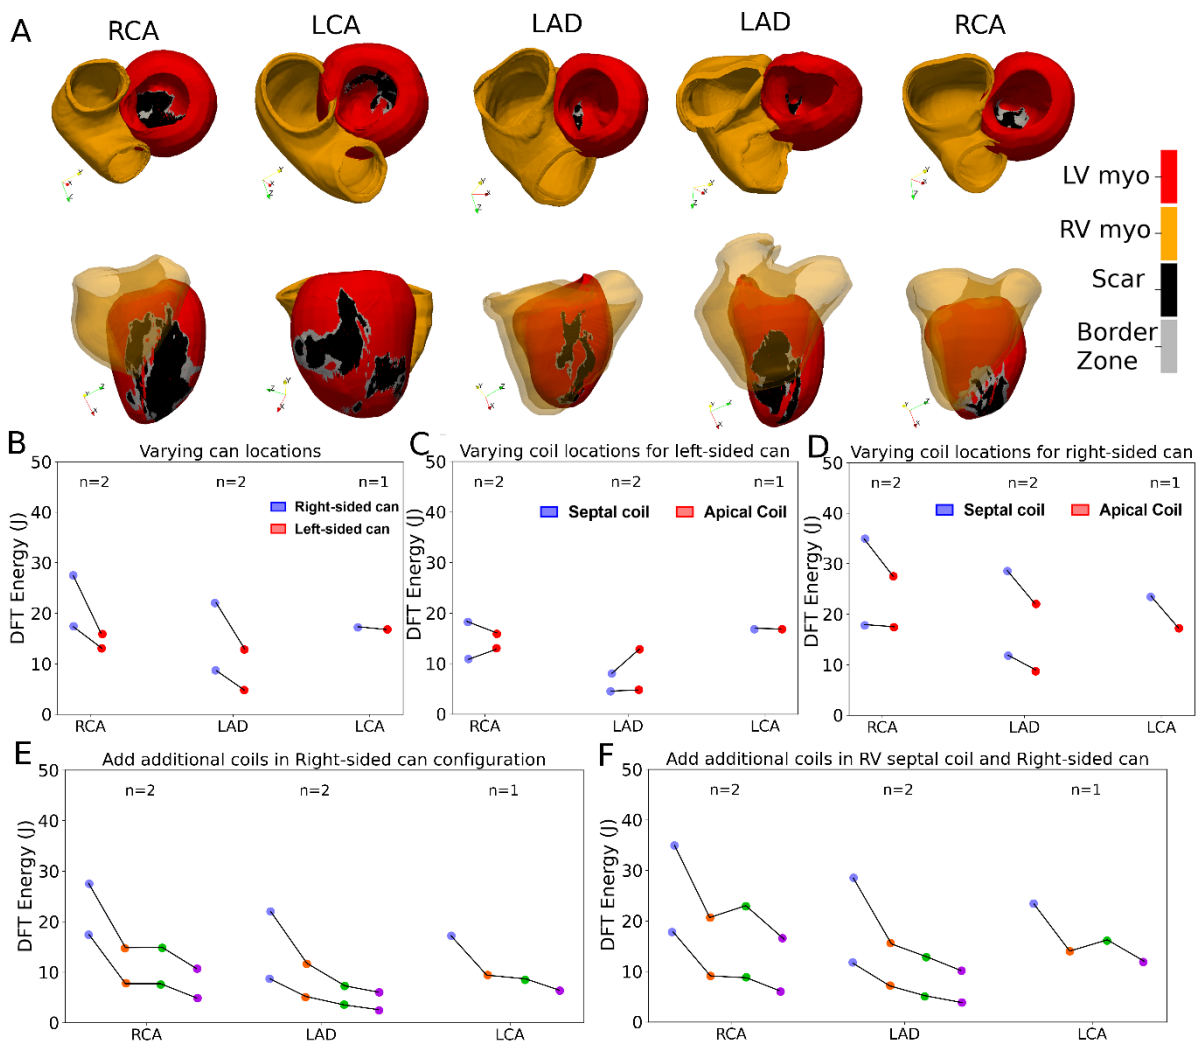

Supplemental Figure 1: A. Mapped infarct scars in five healthy hearts in perfusion territories of RCA, LCA and LAD. B-F: Comparison of DFT Energy (J) with scar patterns as RCA, LCA and LAD using ICD configurations as in Figure 2-5.

**A. Varying can locations**

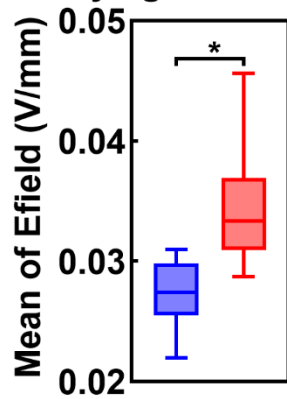

■ Right-sided can  
■ Left-sided can

**B. Add additional coils for right-sided can**

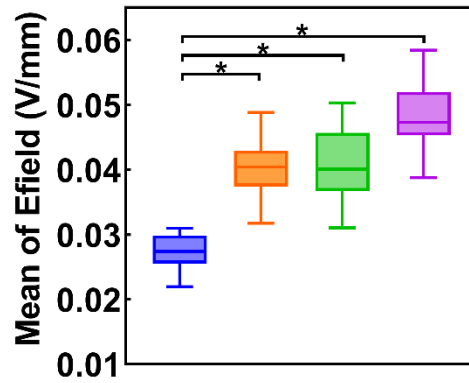

■ No additional coils    ■ SVC coil  
■ CS coil    ■ SVC coil and CS coil

Supplemental Figure 2: Mean electric field for varying can locations. A. Comparison of shocking between shocking electrode at RV apex and left-sided can) (pink bar) with Right-sided can configuration (black bar) in Tukey boxplots (n=20). B. Comparison of shocking between Right-sided can configuration (black bar) with adding "SVC coil", "CS coil" and "both SVC and CS coils" in Tukey boxplots (n=20).

**A. Varying coil locations for left-sided can B. Varying coil locations for right-sided can**

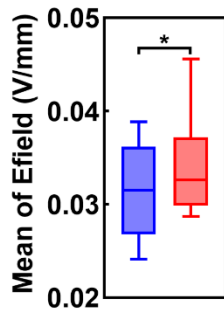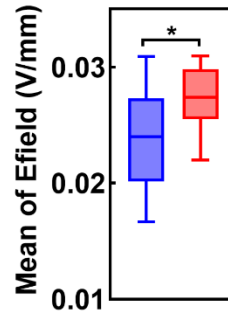

■ Septal coil ■ Apical coil

■ Septal coil ■ Apical coil

**C. Add additional coils for Septal coil and right-sided can**

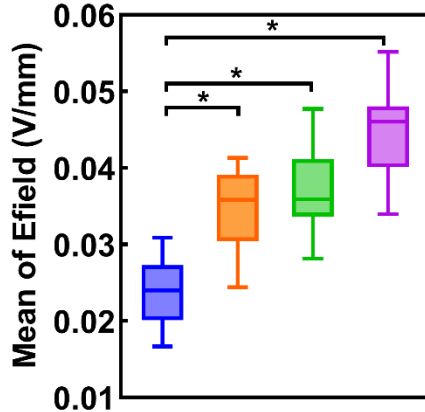

■ No additional coils  
 ■ SVC coil  
 ■ CS coil  
 ■ SVC coil and CS coil

Supplemental Figure 3: Mean electric field for varying can locations. Comparison between RV septal coil and apical coil with using (A) right-sided can and (B) left-sided can in Tukey boxplots (n=20). (C) comparison of shocking between RV septal coil and right-sided can comparing with adding “SVC coil”, “CS coil” and “add both SVC and CS coils” in Tukey boxplots (n=20).
